# Supplementary material for: Myostatin/Appendicular Skeletal Muscle Mass (ASM) Ratio, Not Myostatin, Is Associated with Low Handgrip Strength in Community-Dwelling Older Women
Source: MDPI journal article supplement (doi:10.3390/ijerph18147344), 2021-07-09

## Supporting Information

**Figure S1** Cohort construction. DEXA, dual-energy X-ray absorptiometry.

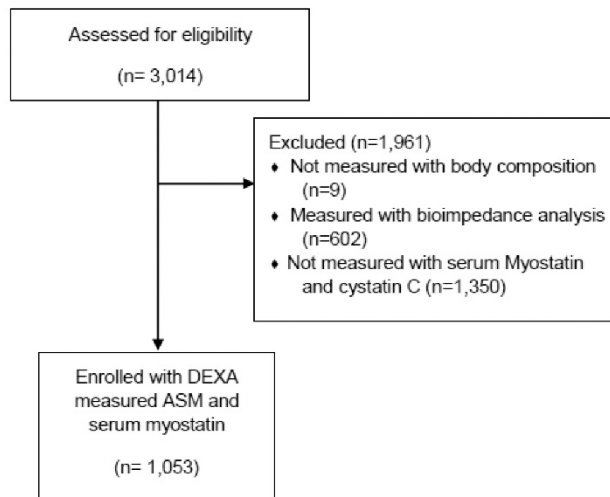

**Figure S2.** Comparison of proportions (%) with sarcopenia and severe sarcopenia by Asian Working Group for Sarcopenia 2019 and chronic kidney disease (CKD) according to serum myostatin quartile.

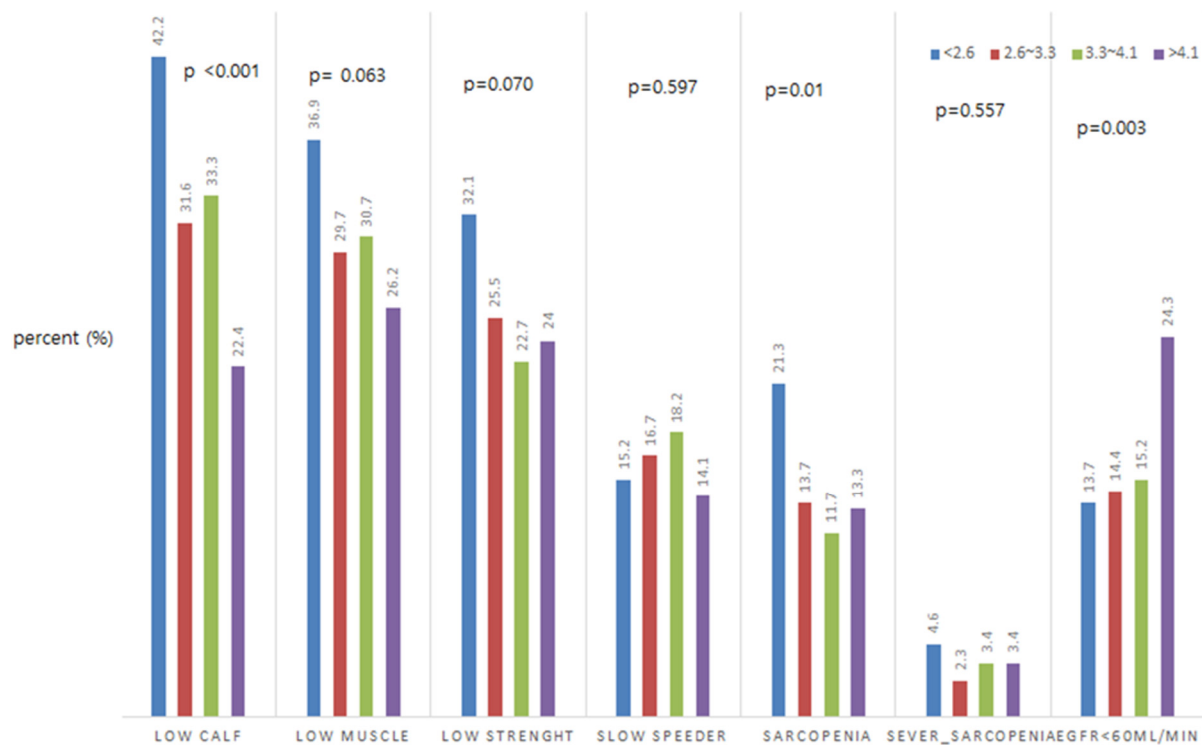

Supplement: s1 [file s1]
